# Supplementary figures and images for: PhotoElasticFinger: Robot Tactile Fingertip Based on Photoelastic Effect
Source: MDPI journal article supplement (doi:10.3390/s22186807), 2022-09-08

Gripper

Clamping  
Magnet

Camera

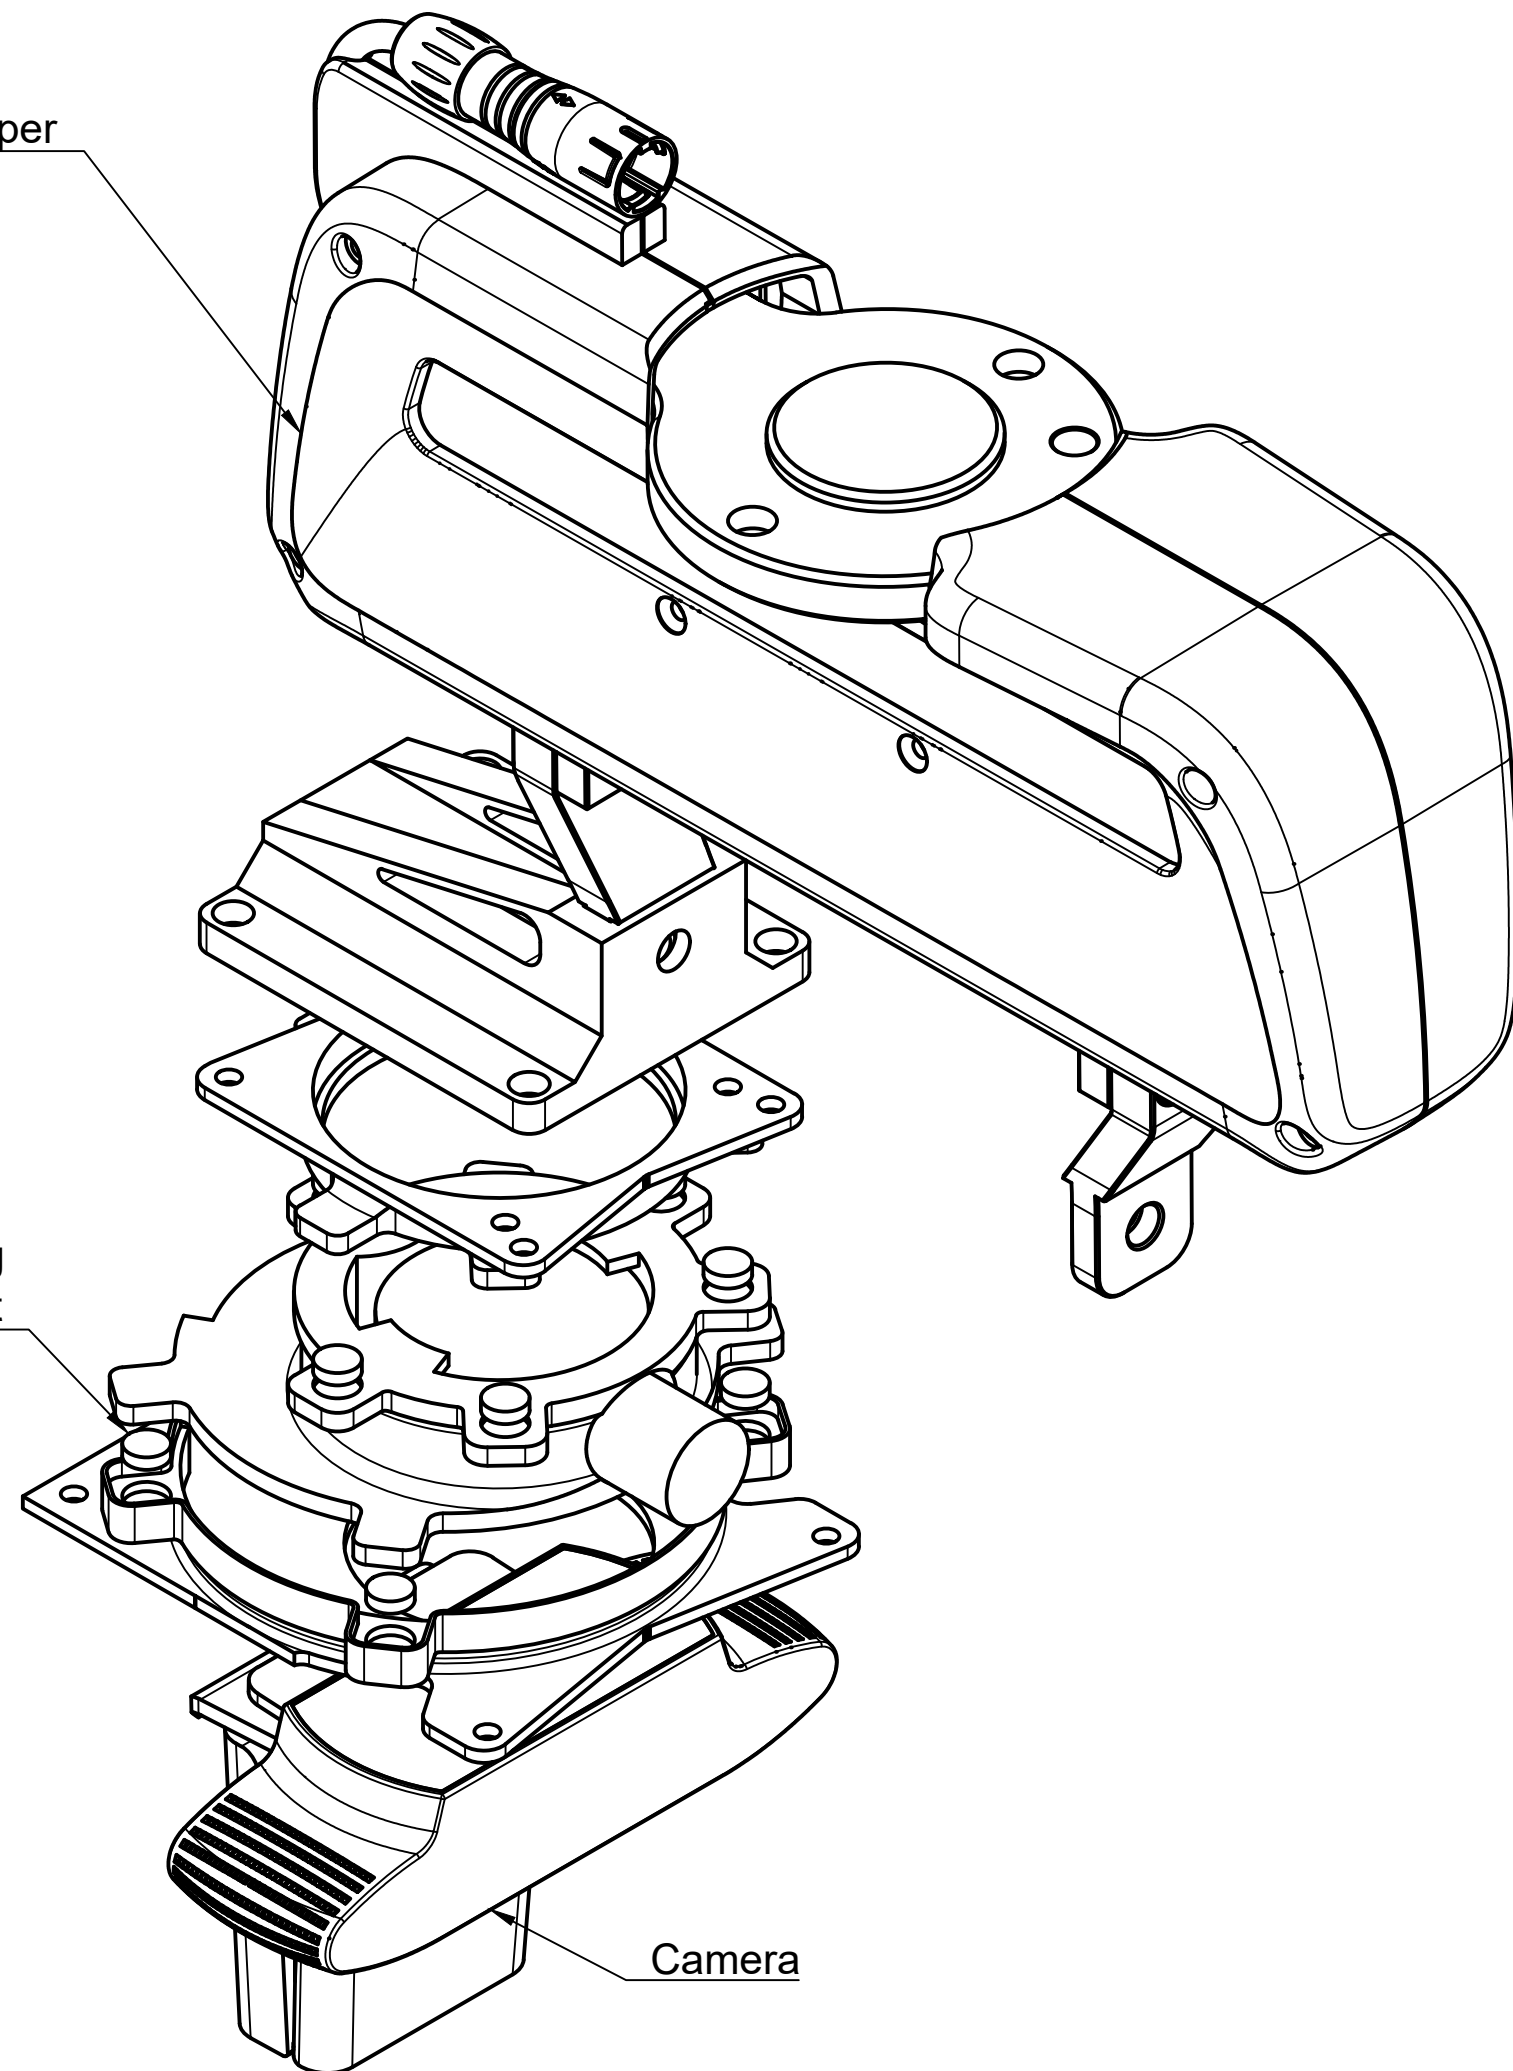

Supplement: s1 [file s1]
